# Supplementary material for: Achieving high-rate and high-capacity Zn metal anodesviaa three-in-one carbon protective layer
Source: Royal Society of Chemistry journal article supplement (doi:10.1039/d2ta04875b), 2022-01-01
Supplement: d2ta04875b1.pdf [file d2ta04875b1.pdf]

**Achieving high-rate and high-capacity Zn metal anodes via a three-in-one carbon protective layer**

*Hongyu Qin<sup>a</sup>, Wei Kuang<sup>b</sup>, Dan Huang<sup>b</sup>, Xiaoyan Zhang<sup>a</sup>, Jian Liu<sup>c</sup>, Li Yi<sup>a</sup>, Fang Shen<sup>a</sup>, Zongwu Wei<sup>d</sup>, Yanping Huang<sup>a</sup>, Jing Xu<sup>a</sup>, Huibing He<sup>a\*</sup>*

*<sup>a</sup> School of Chemistry and Chemical Engineering, Guangxi Key Laboratory of Petrochemical Resource Processing and Process Intensification Technology, Guangxi University, Nanning 530004, PR China*

*<sup>b</sup> School of Physical Science and Technology, Guangxi Novel Battery Materials Research Center of Engineering Technology, Guangxi University, Nanning 530004, PR China*

*<sup>c</sup> School of Engineering, Faculty of Applied Science, The University of British Columbia, Kelowna, BC V1V 1V7 Canada.*

*<sup>d</sup> School of Resources, Environmental and Materials, Guangxi University, Nanning 530004, PR China*

\* Corresponding author: [huibinghe@gxu.edu.cn](mailto:huibinghe@gxu.edu.cn) (Huibing He)

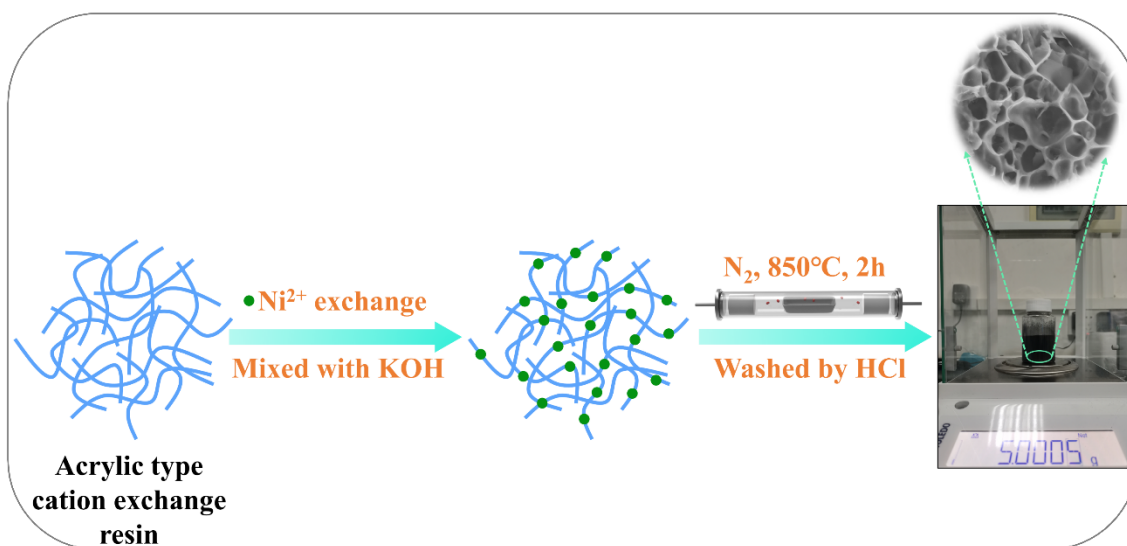

**Figure S1.** Synthetic process of 3D-NC powder with a 5 g yield per batch.

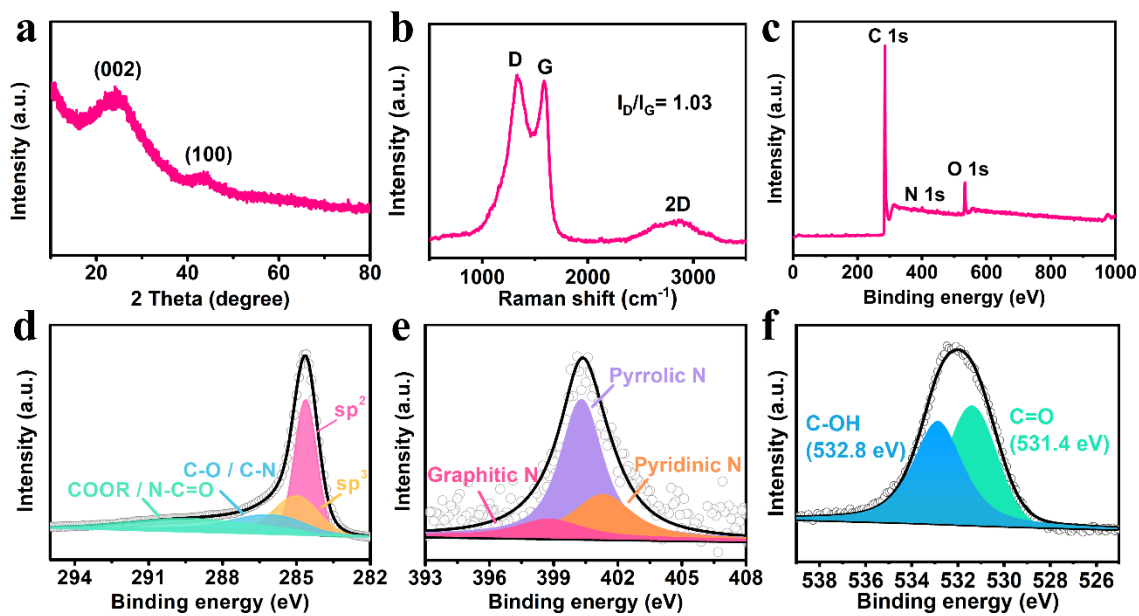

**Figure S2.** Physical characterization of 3D-NC. a) XRD patterns, b) Raman spectrum, and c) XPS survey spectrum of 3D-NC, XPS spectra of d) C 1s, e) N 1s and f) O1s.

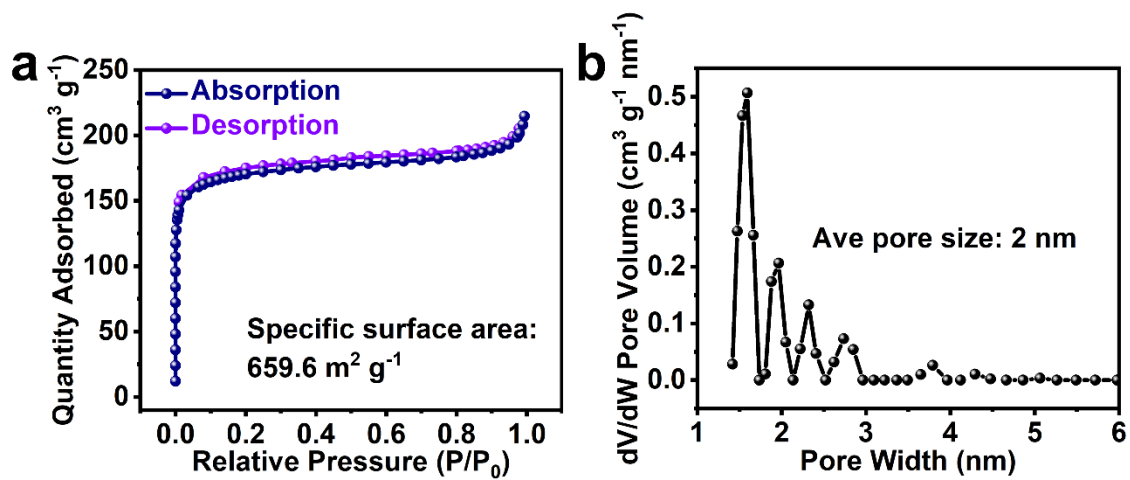

**Figure S3.** a) Nitrogen adsorption/desorption isotherms and b) Corresponding pore size distribution of the 3D-NC.

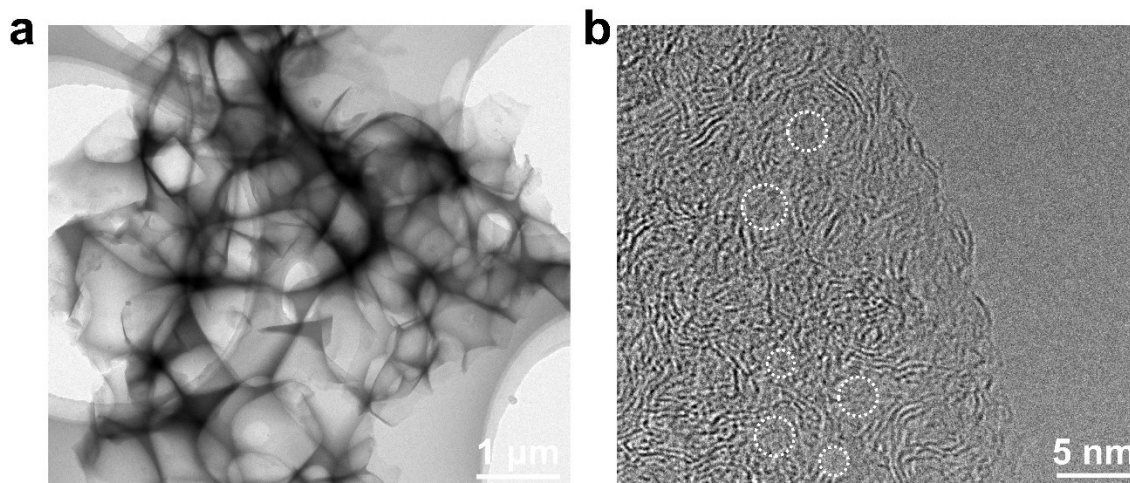

**Figure S4.** TEM (a) and high-resolution TEM (b) images of 3D-NC.

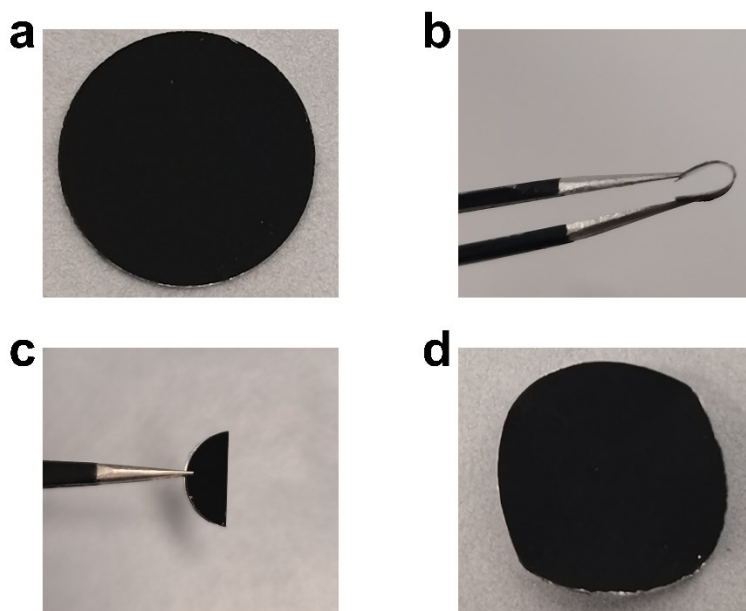

**Figure. S5** Optical images of 3D-NC@Zn before (a), after bending (b,c) and repeated bending (d).

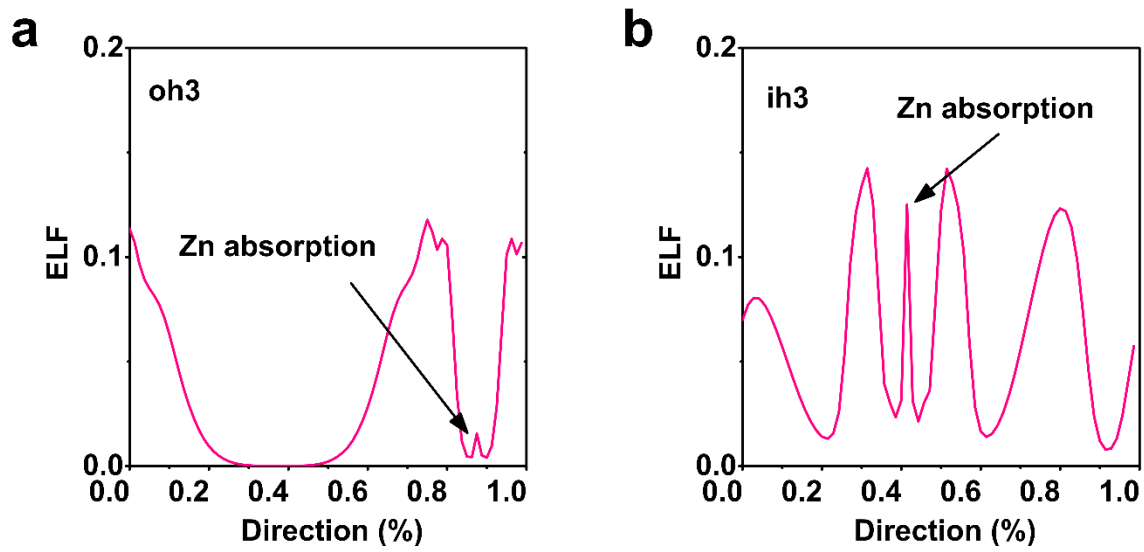

**Figure S6.** ELF curves of Zn absorbed on different sites of oh3 and ih3.

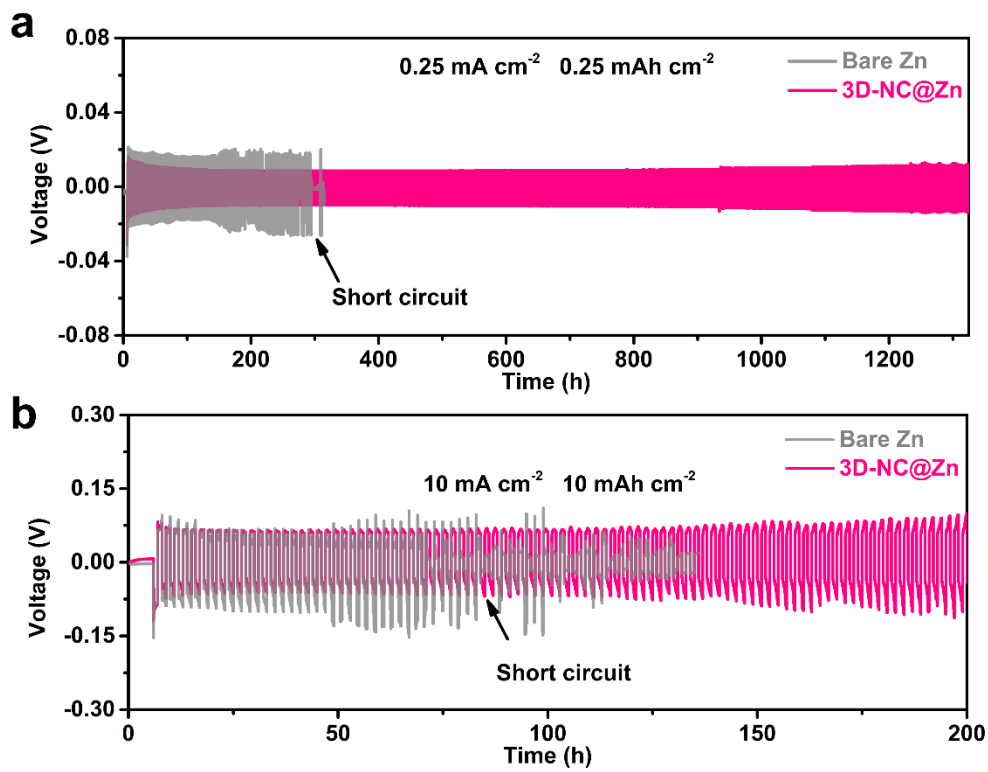

**Figure S7.** Galvanostatic cycling performance of symmetric cells at a)  $0.25 \text{ mA cm}^{-2}$ ,  $0.25 \text{ mAh cm}^{-2}$  and b)  $10 \text{ mA cm}^{-2}$ ,  $10 \text{ mAh cm}^{-2}$ .



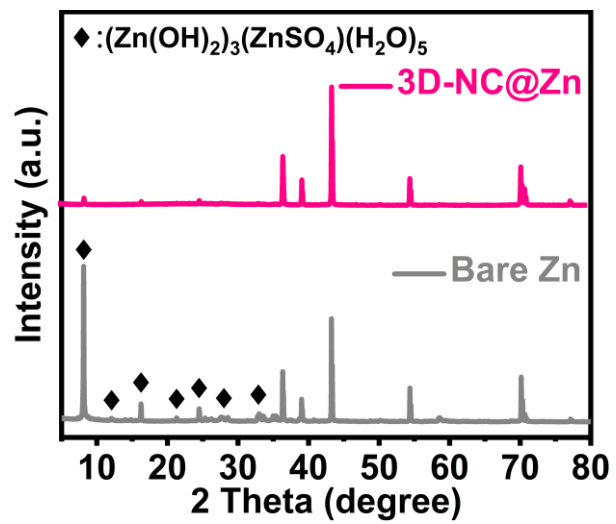

**Figure S8.** XRD patterns of Zn anode after cycled at  $0.25 \text{ mA cm}^{-2}$ ,  $0.25 \text{ mAh cm}^{-2}$ .

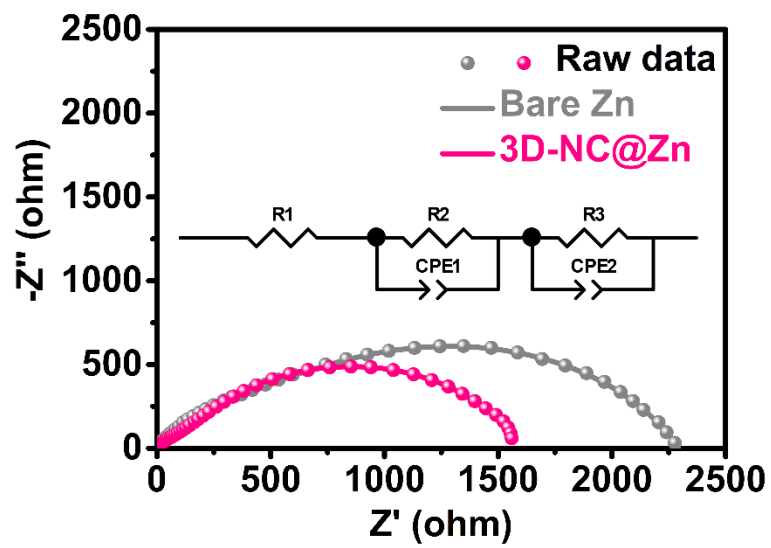

**Figure S9.** Nyquist plots of symmetric cells after cycled 1000 h at  $10 \text{ mA cm}^{-2}$ ,  $1 \text{ mAh cm}^{-2}$

2.

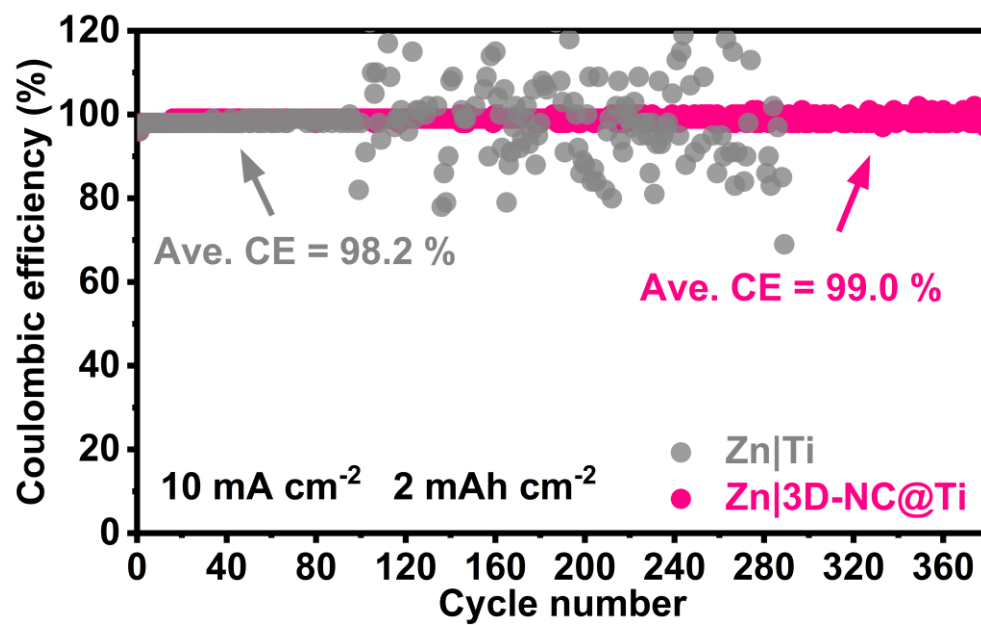

**Figure S10.** Coulombic efficiency of bare Zn|Ti and Zn|3D-NC@Ti asymmetric cell at 10 mA cm<sup>-2</sup>, 2 mAh cm<sup>-2</sup>.

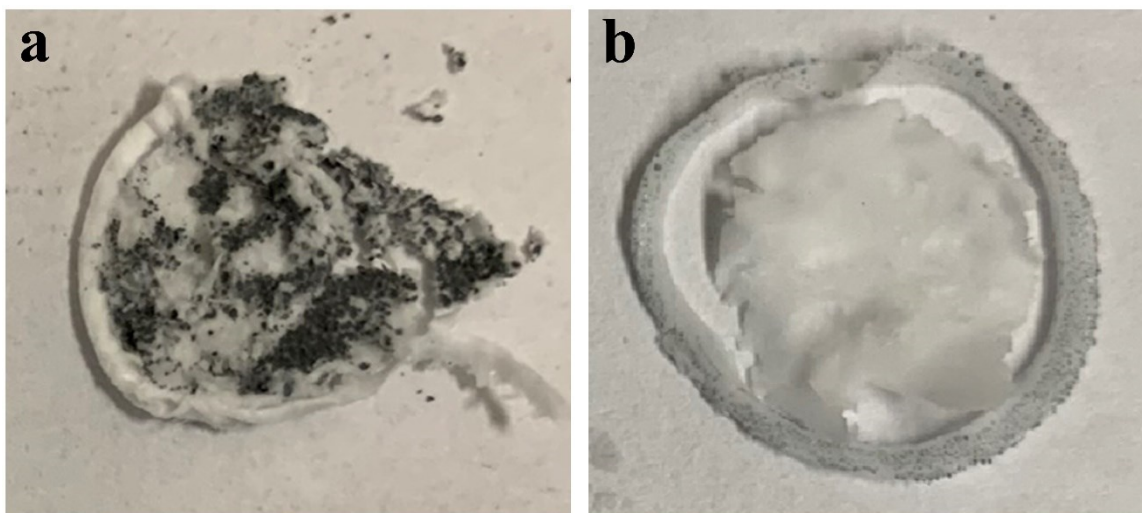

**Figure S11.** Optical images of the glass fibers recovered from a) bare Zn symmetric cell and b) 3D-NC@Zn after cycled 1000 h at  $10 \text{ mA cm}^{-2}$ ,  $1 \text{ mAh cm}^{-2}$ .

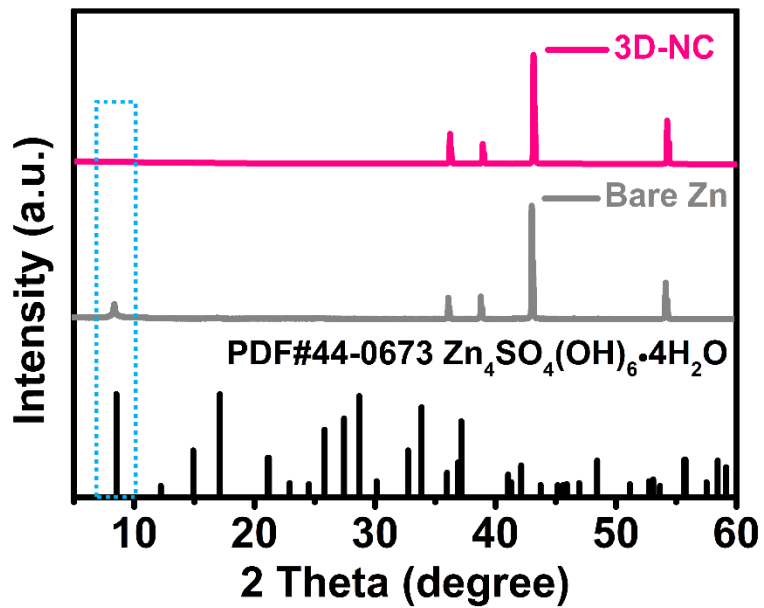

**Figure S12.** XRD patterns of bare Zn and 3D-NC@Zn after being soaked in the 2 M  $ZnSO_4$  electrolyte for 7 days.

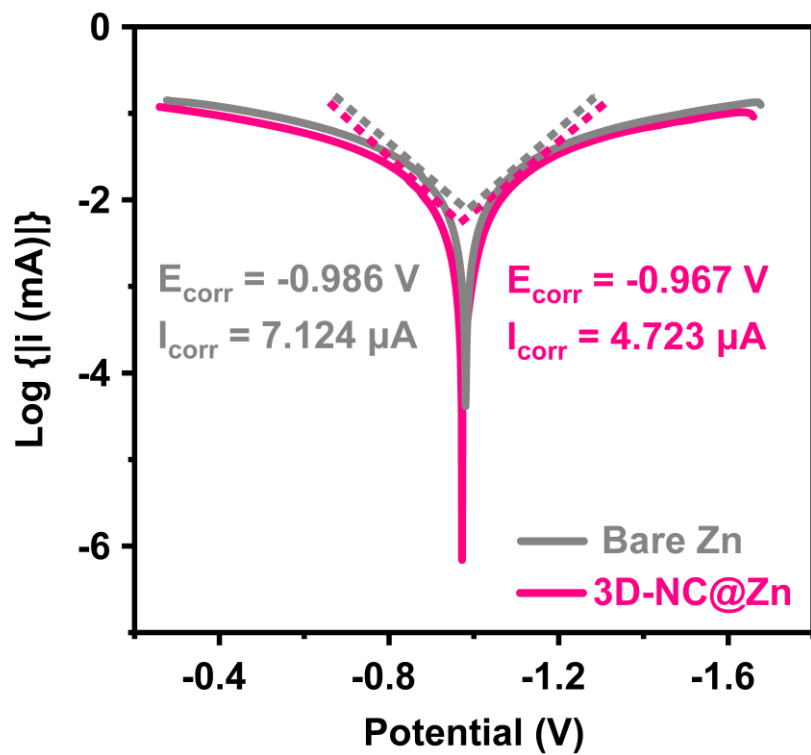

**Figure S13.** The linear polarization curves of bare Zn and 3D-NC@Zn electrodes.

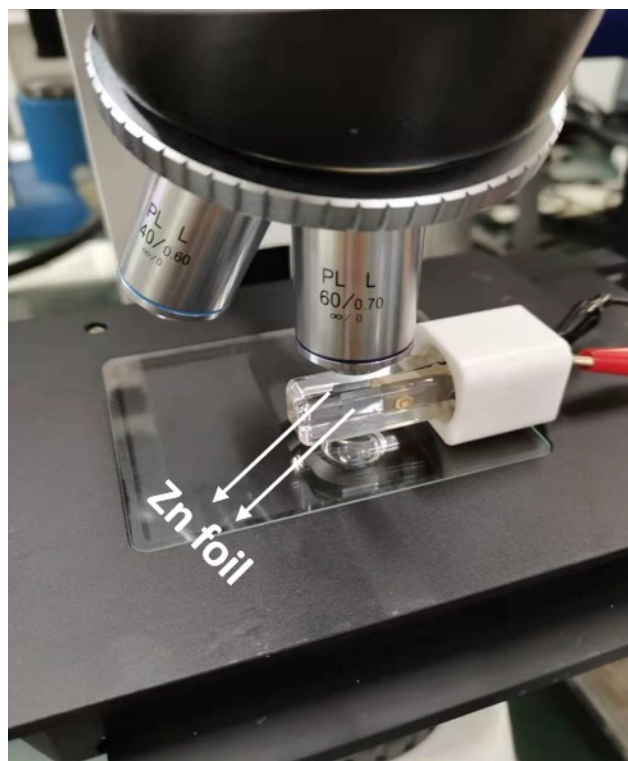

**Figure S14.** Exhibition of *in-situ* optical microscopy equipped with a transparent electrochemical cell.

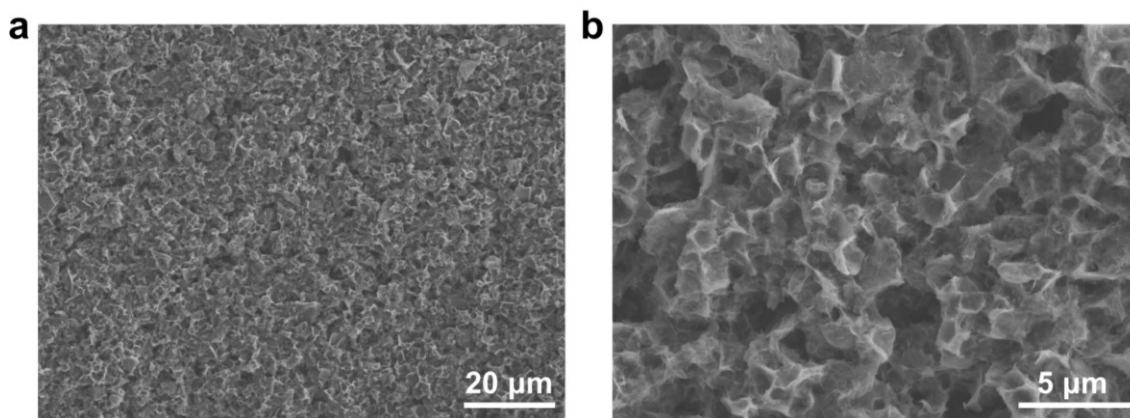

**Figure S15.** Structure observation of the 3D-NC layer after stripping for 10 mAh cm<sup>-2</sup> at 1 mA cm<sup>-2</sup>.



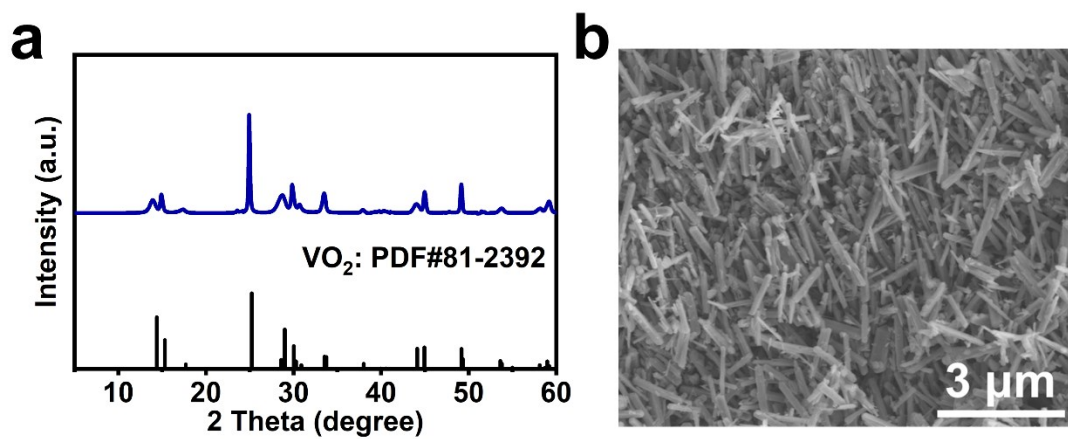

**Figure S16.** a) XRD patterns, and b) SEM images of the synthesized VO<sub>2</sub>.

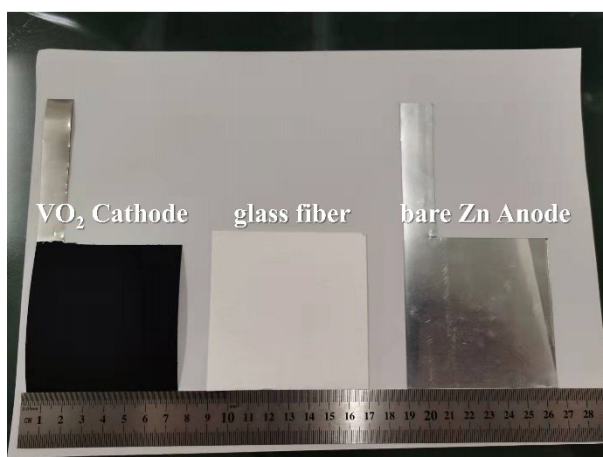

**Figure S17.** Optical images of the VO<sub>2</sub> cathode, glass fiber and bare Zn anode for the single stack in the bare Zn|VO<sub>2</sub> pouch cell.

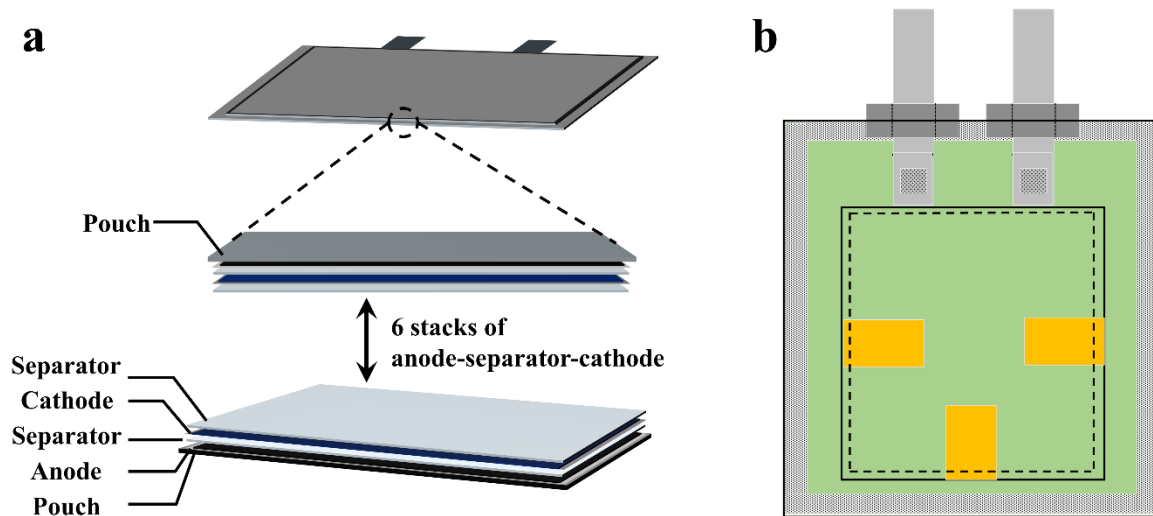

**Figure S18.** a) Illustration of the internal configuration for pouch cell. b) Schematic of the pouch cell (the green area is under compression stress by a fixture when the battery is cycling).

**Table S1.** Comparison of the cumulative plating capacity of 3D-NC@Zn with recently reported Zn metal anodes with surface modification.

| Electrode       | Current density (mA cm <sup>-2</sup> ) | Capacity (mAh cm <sup>-2</sup> ) | Voltage hysteresis (mV) | Cycle life (h) | Depth of discharge (DOD %) | Cumulative plating capacity (mAh cm <sup>-2</sup> ) | Ref.             |
|-----------------|----------------------------------------|----------------------------------|-------------------------|----------------|----------------------------|-----------------------------------------------------|------------------|
| Sn@Zn           | 1                                      | 1                                | ~60                     | 2200           | 0.68                       | 1100                                                | 44               |
| HsGDY@Zn        | 2                                      | 0.1                              | ~140                    | 2400           | /                          | 1200                                                | 46               |
| ZCO-30@Zn       | 2                                      | 2                                | ~80                     | 1400           | /                          | 1400                                                | 49               |
| Sb@Zn           | 3                                      | 1                                | ~60                     | 1000           | 1.71                       | 1500                                                | 47               |
| BTO@Zn          | 5                                      | 2.5                              | ~40                     | 1500           | 14.3                       | 3750                                                | 43               |
| ZnSe@Zn         | 2                                      | 1                                | ~100                    | 1500           | /                          | 1500                                                | 48               |
| SIR@Zn          | 2                                      | 2                                | ~60                     | 3500           | 0.21                       | 3500                                                | 34               |
| BN@Zn           | 5                                      | 2.5                              | ~80                     | 1600           | 0.43                       | 4000                                                | 50               |
| CNG@Zn          | 1                                      | 0.5                              | 84                      | 2956           | 4.75                       | 1478                                                | 45               |
| <b>3D-NC@Zn</b> | <b>1</b>                               | <b>10</b>                        | <b>36.6</b>             | <b>1300</b>    | <b>17.1</b>                | <b>650</b>                                          | <b>This work</b> |
|                 | <b>10</b>                              | <b>1</b>                         | <b>125</b>              | <b>1300</b>    | <b>1.71</b>                | <b>6500</b>                                         |                  |

**Table S2.** Fitted EIS results of Zn|Zn symmetric cells before cycled.

| <b>Electrode</b> | <b>R<sub>SEI</sub> (<math>\Omega</math>)</b> | <b>R<sub>ct</sub> (<math>\Omega</math>)</b> |
|------------------|----------------------------------------------|---------------------------------------------|
| Bare Zn          | 250                                          | 788                                         |
| 3D-NC@Zn         | 18.1                                         | 439.9                                       |

**Table S3.** Fitted EIS results of Zn|Zn symmetric cells after cycled 1000 h at 10 mA cm<sup>-2</sup>, 1 mAh cm<sup>-2</sup>.

| <b>Electrode</b> | <b>R<sub>SEI</sub> (<math>\Omega</math>)</b> | <b>R<sub>ct</sub> (<math>\Omega</math>)</b> |
|------------------|----------------------------------------------|---------------------------------------------|
| Bare Zn          | 450.9                                        | 1841                                        |
| 3D-NC@Zn         | 90.8                                         | 1519                                        |

**Table S4.** Fitted corrosion parameters results from LSV curve.

| <b>Electrode</b> | <b>E<sub>corr</sub> (V)</b> | <b>I<sub>corr</sub> (<math>\mu</math>A)</b> |
|------------------|-----------------------------|---------------------------------------------|
| Bare Zn          | -0.986                      | 7.124                                       |
| 3D-NC@Zn         | -0.967                      | 4.723                                       |

**Table S5.** Comparison of DOD values of reported Zn metal in full cells.

| <b>Anode</b>                       | <b>Cathode</b>        | <b>Current density (A g<sup>-1</sup>)</b> | <b>DOD of Zn (%)</b> | <b>Life cycle</b> | <b>Ref</b>       |
|------------------------------------|-----------------------|-------------------------------------------|----------------------|-------------------|------------------|
| Ag@Zn                              | MnO <sub>2</sub>      | 1                                         | 0.13                 | 4000              | 15               |
| Al <sub>2</sub> O <sub>3</sub> @Zn | MnO <sub>2</sub>      | 1                                         | 0.37                 | 1000              | 13               |
| In@Zn                              | AC                    | 2                                         | 0.24                 | 5000              | 58               |
| N@Zn                               | MnO <sub>2</sub>      | 1                                         | 0.079                | 2000              | 59               |
| Cu-Zn@Zn                           | MnO <sub>2</sub>      | 3.08                                      | 0.18                 | 500               | 60               |
| C-750@Zn                           | MnO <sub>2</sub>      | 0.3                                       | 0.33                 | 5000              | 61               |
| SIR@Zn                             | VS <sub>2</sub>       | 5                                         | 0.25                 | 1000              | 34               |
| <b>3D-NC@Zn</b>                    | <b>VO<sub>2</sub></b> | <b>1</b>                                  | <b>0.42</b>          | <b>1000</b>       | <b>This work</b> |

**Table S6.** The specifications of the Zn|VO<sub>2</sub> punch cell with a designed capacity of 1.12 Ah

|                                               | <b>Specification</b>          | <b>Value</b> | <b>Units</b>         | <b>Notes</b>                                      |
|-----------------------------------------------|-------------------------------|--------------|----------------------|---------------------------------------------------|
| <b>Cathode</b><br>(VO <sub>2</sub> @Ti foil)  | Reversible capacity           | 244          | mAh g <sup>-1</sup>  | at 0.1 Ag <sup>-1</sup>                           |
|                                               | Voltage                       | 0.8          | V                    | vs. Zn <sup>2+</sup> /Zn                          |
|                                               | Active material ratio         | 70%          | /                    | VO <sub>2</sub> : Carbon black:<br>PVDF = 7: 2: 1 |
|                                               | Electrode thickness           | 180          | μm                   | double sides                                      |
|                                               | Mass loading                  | 20           | mg cm <sup>-2</sup>  | double sides                                      |
|                                               | Number of stacks              | 6            | /                    | /                                                 |
|                                               | Electrode area                | 54.76        | cm <sup>2</sup>      | 7.4 cm × 7.4 cm                                   |
|                                               | Area capacity                 | 4.10         | mAh cm <sup>-2</sup> | double sides                                      |
|                                               | Total capacity                | 1122.4       | mAh                  | double sides                                      |
|                                               | VO <sub>2</sub> powder amount | 5.06         | g                    | 10% excess for slurry<br>making in case of waste  |
| <b>Anode</b><br>(Zn foil)                     | Theoretical capacity          | 820          | mAh g <sup>-1</sup>  | /                                                 |
|                                               | Voltage                       | 0            | V                    | vs. Zn <sup>2+</sup> /Zn                          |
|                                               | Thickness                     | 100          | μm                   | /                                                 |
|                                               | Number of stacks              | 6            | /                    | /                                                 |
|                                               | Electrode area                | 57.76        | cm <sup>2</sup>      | 7.6 cm × 7.6 cm                                   |
| <b>Separator</b><br>(glass fiber)             | Thickness                     | 300          | μm                   | Whatman, GF/D                                     |
|                                               | Number of stacks              | 7            | /                    | /                                                 |
|                                               | Area                          | 64           | cm <sup>2</sup>      | 8.0 cm × 8.0 cm                                   |
| <b>Electrolyte</b><br>(2M ZnSO <sub>4</sub> ) | Volume                        | 11           | mL                   | ~10 mL/Ah, flooded                                |
